# Supplementary material for: Enhancing the Thermo-Stability and Anti-Biofilm Activity of Alginate Lyase by Immobilization on Low Molecular Weight Chitosan Nanoparticles
Source: MDPI journal article supplement (doi:10.3390/ijms20184565), 2019-09-14
Supplement: s1 [file s1]

## Supplementary Materials

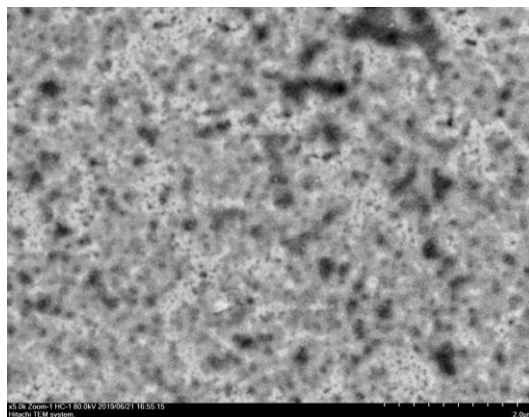

**Figure S1.** Transmission electron micrograph (TEM) analysis of high molecular weight chitosan nanoparticles.
